# Supplementary material for: Methionine epimerization in cyclic peptides
Source: Royal Society of Chemistry journal article supplement (doi:10.1039/d1ra04260b), 2021-01-01
Supplement: d1ra04260b1.pdf [file d1ra04260b1.pdf]

## Methionine epimerization in cyclic peptides

Pramodkumar D. Jadhav<sup>a,\*</sup>, Jianheng Shen<sup>a</sup>, Peta-Gaye Burnett<sup>a</sup>, Jian Yang<sup>b</sup>, Ramaswami

Sammynaiken<sup>c</sup>, Martin J.T. Reaney<sup>a,d,e,\*</sup>

<sup>a</sup> Department of Plant Sciences, University of Saskatchewan, Saskatoon, SK S7N 5A8, Canada

<sup>b</sup> Drug Discovery and Development Research Group, College of Pharmacy and Nutrition, University of Saskatchewan, 107 Wiggins Road, Saskatoon, SK S7N 5E5, Canada

<sup>c</sup> Saskatchewan Structural Sciences Centre, University of Saskatchewan, 110 Science Place, Saskatoon, SK S7N 5C9, Canada

<sup>d</sup> Prairie Tide Diversified Inc., 102 Melville Street, Saskatoon, Saskatchewan S7J 0R1, Canada

<sup>e</sup> Guangdong Saskatchewan Oilseed Joint Laboratory, Department of Food Science and Engineering, Jinan University, 601, Huangpu Avenue West, Guangzhou, Guangdong 510632, China

\*Corresponding authors: Tel.: +1 306 966 5027; Fax: +1 306 966 5015.

E-mail address: pramodkumar.jadhav@usask.ca; martin.reaney@usask.ca

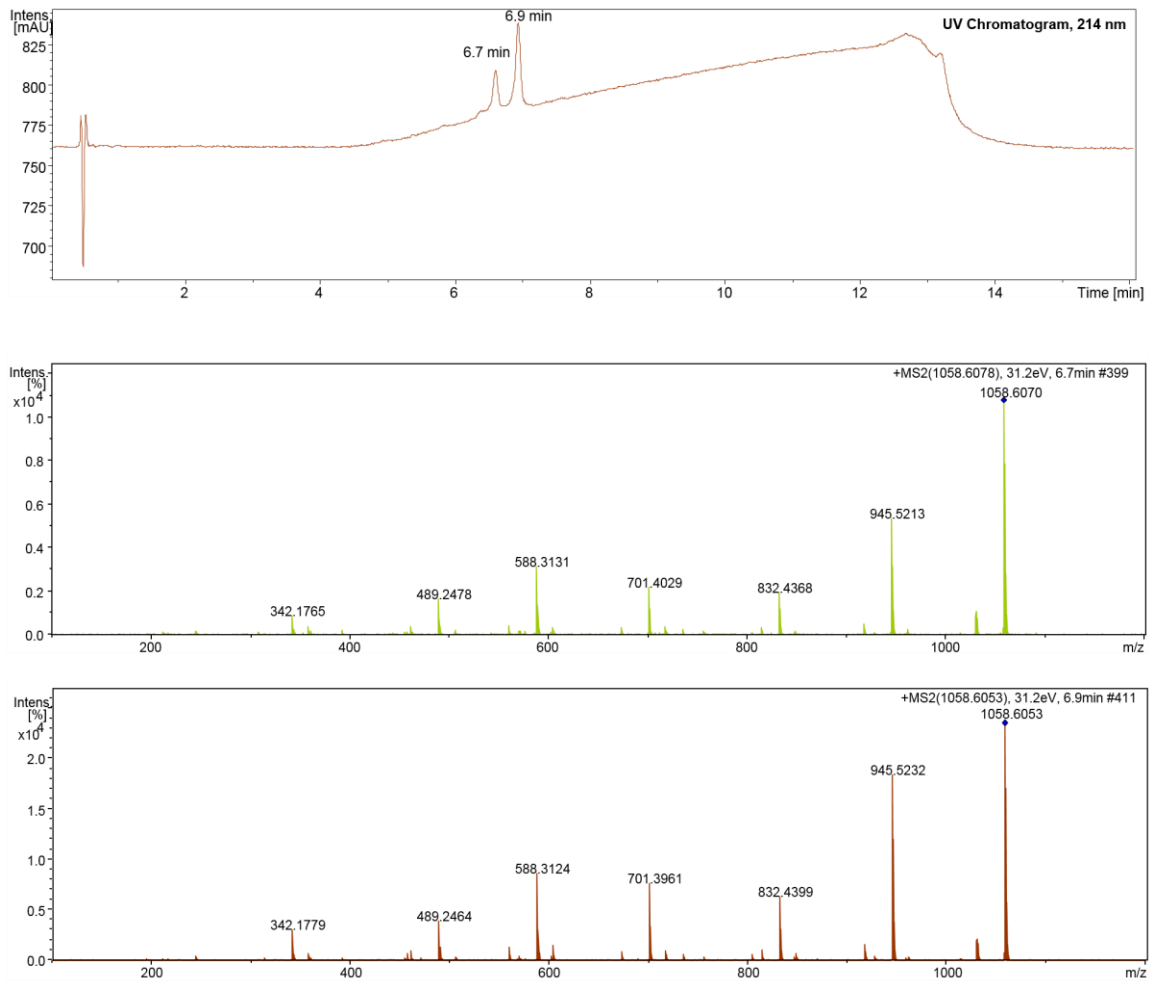

**Fig. S1:** UV chromatogram of KOH treated LO 2, MS/MS chromatogram of peak 1 (6.7 min) and peak 2 (6.9 min).

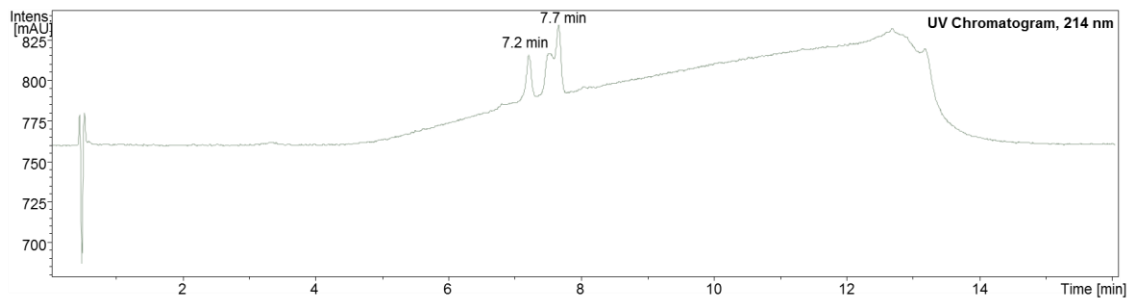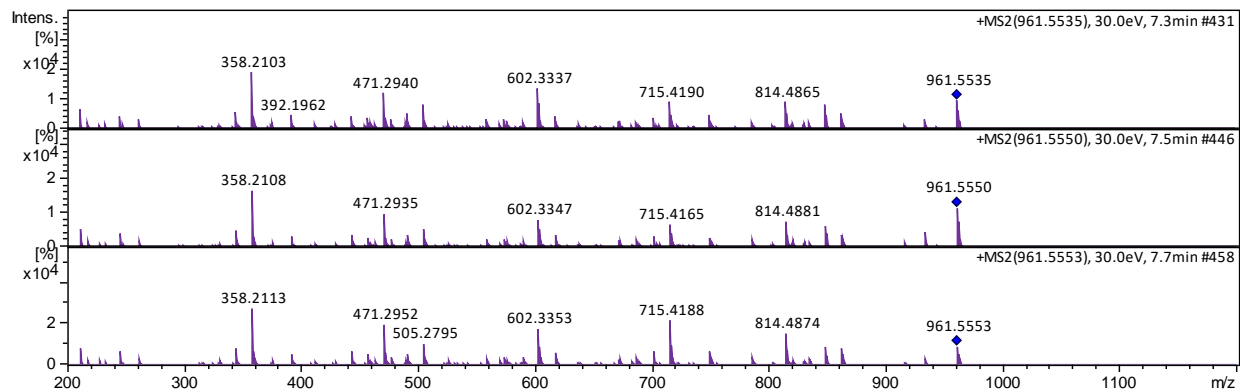

**Fig. S2:** UV chromatogram of KOH treated LO 5, MS/MS chromatogram of peak 1 (7.2 min), peak 2 (7.5 min) and peak 3 (7.7 min).

### MDA-MB-231: DMetO-LOB2 (9)

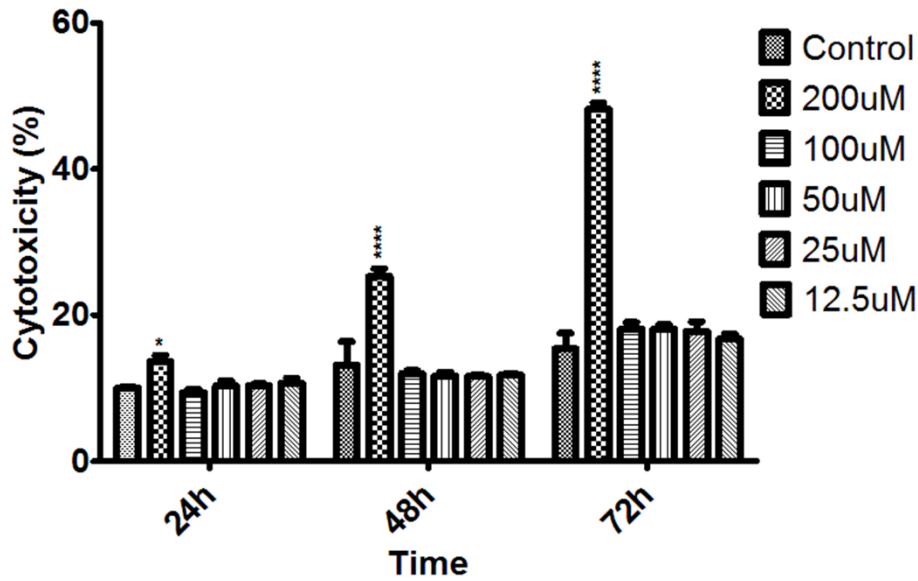

### MDA-MB-231: MetO-LOB2 (3)

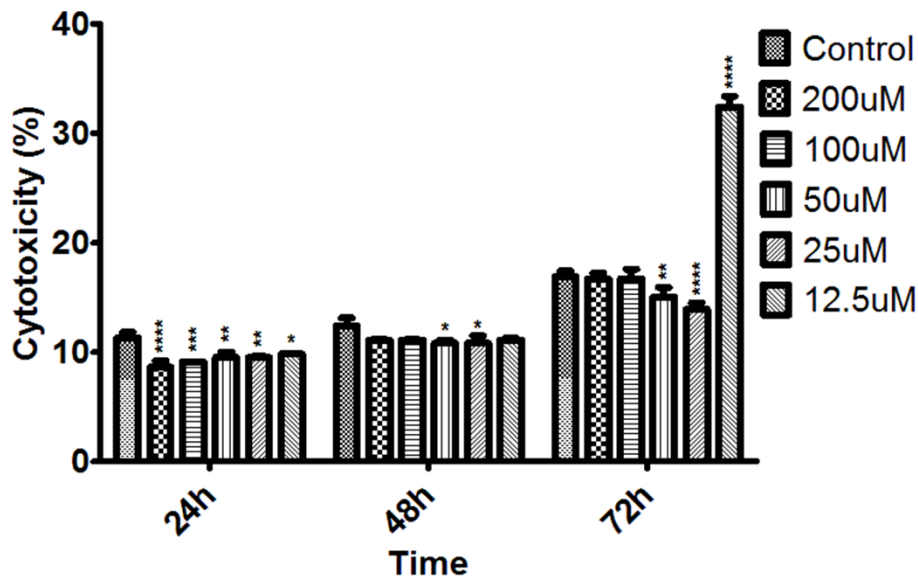

Fig. S3 % cytotoxicity of D-MetO-LOB2 (9) and L-MetO-LOB2 (3) against the MDA-MB-231 cells.

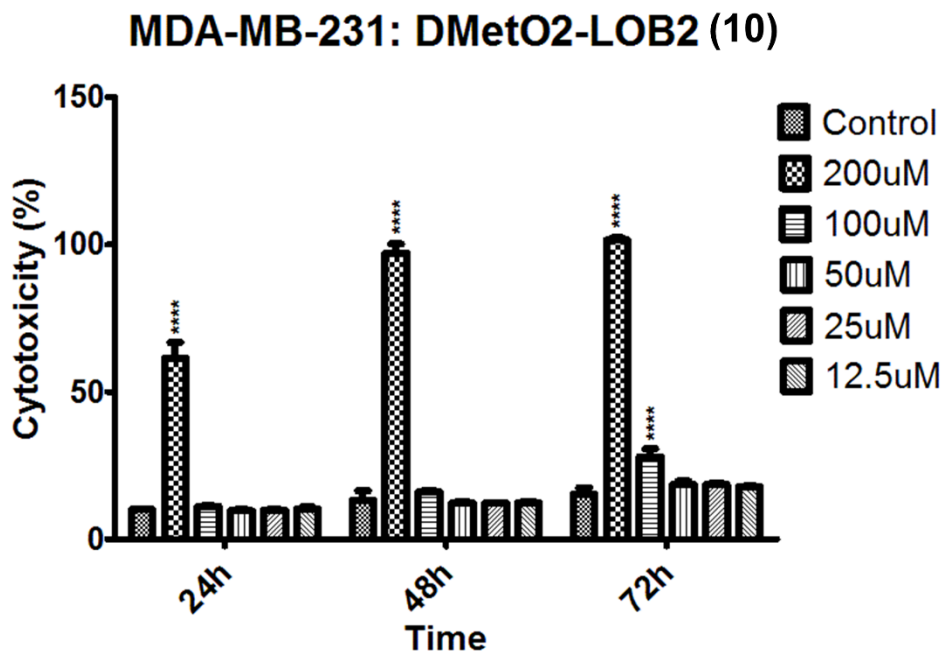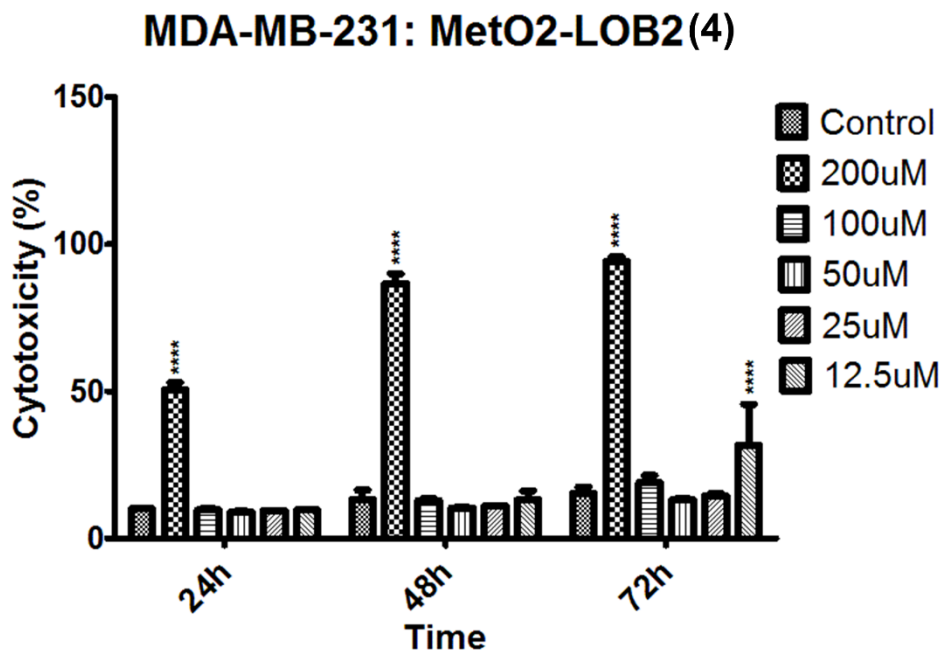

**Fig. S4.** % cytotoxicity of D-MetO<sub>2</sub>-LOB2 (10) and L-MetO<sub>2</sub>-LOB2 (4) against the MDA-MB-231 cells.

### MDA-MB-231: DMetO-LOB1 (12)

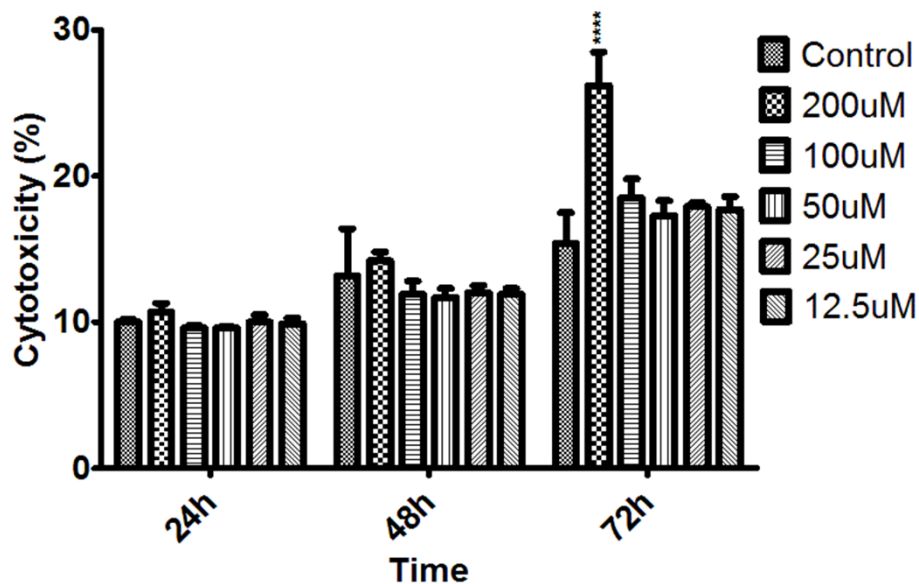

### MDA-MB-231: MetO-LOB1 (6)

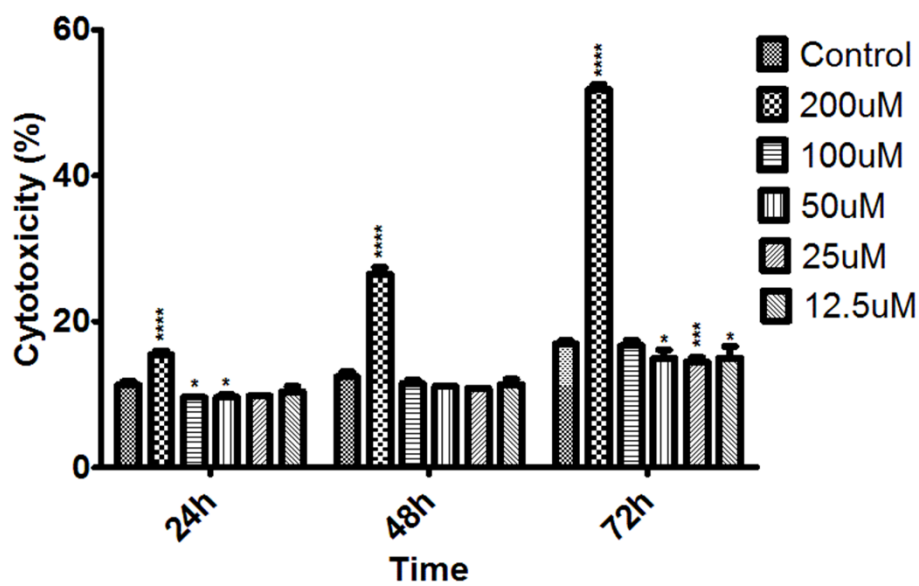

Fig. S5. % cytotoxicity of D-MetO-LOB1 (12) and L-MetO-LOB1 (6) against the MDA-MB-231 cells.

### MDA-MB-231: LOB1 (5)

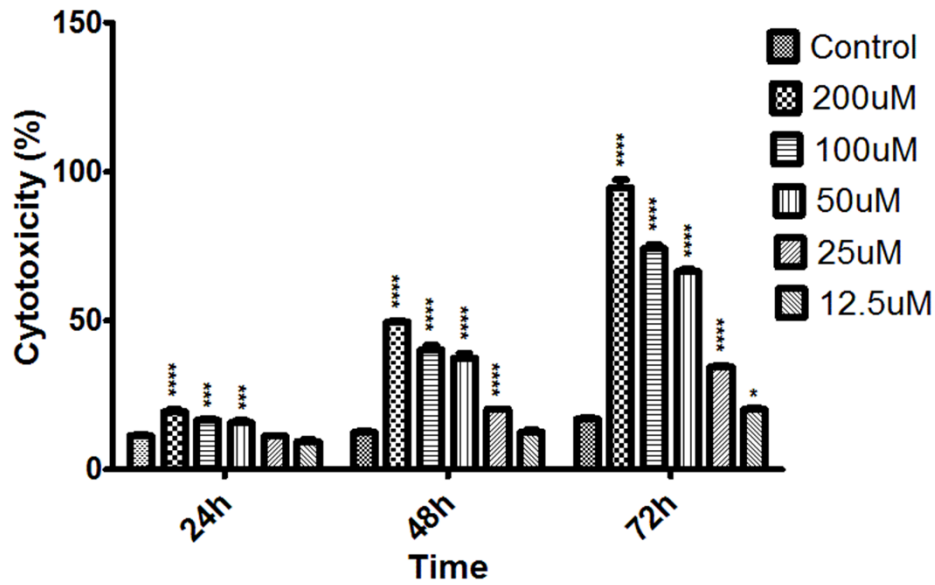

### MDA-MB-231: MetO2-LOB1 (7)

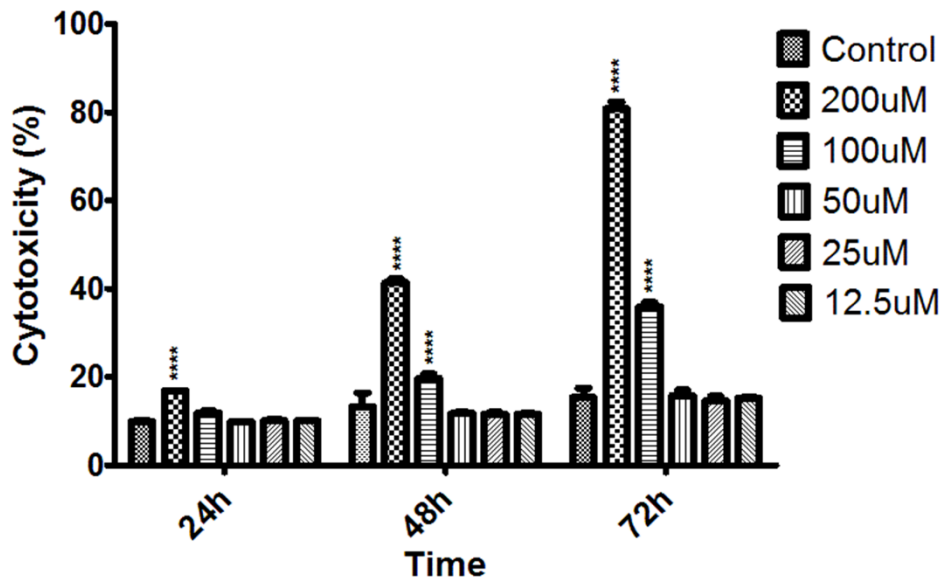

Fig. S6. % cytotoxicity of LOB1 (5) and L-MetO<sub>2</sub>-LOB1 (7) against the MDA-MB-231 cells.

### Sk-Br-3: DMet-LOB2 (8)

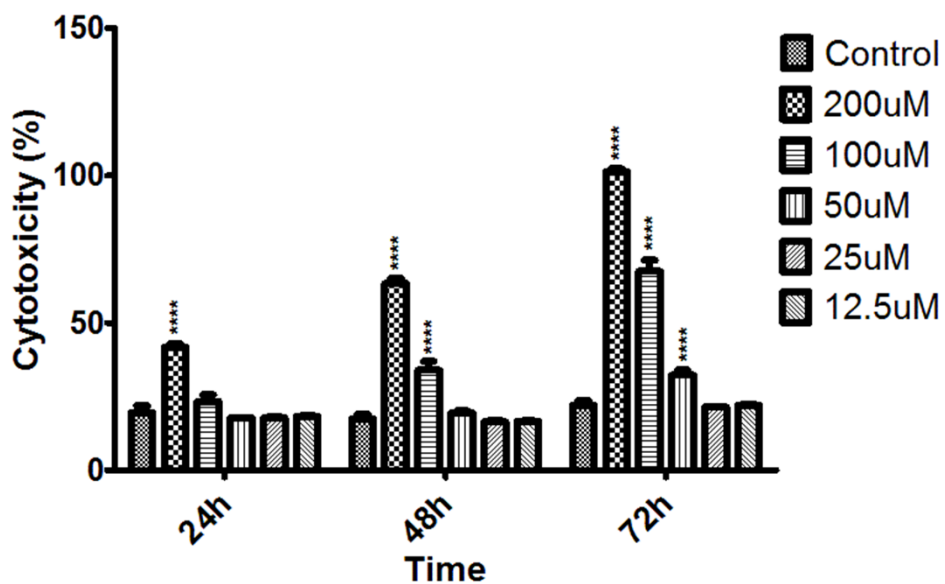

### Sk-Br-3: LOB2 (2)

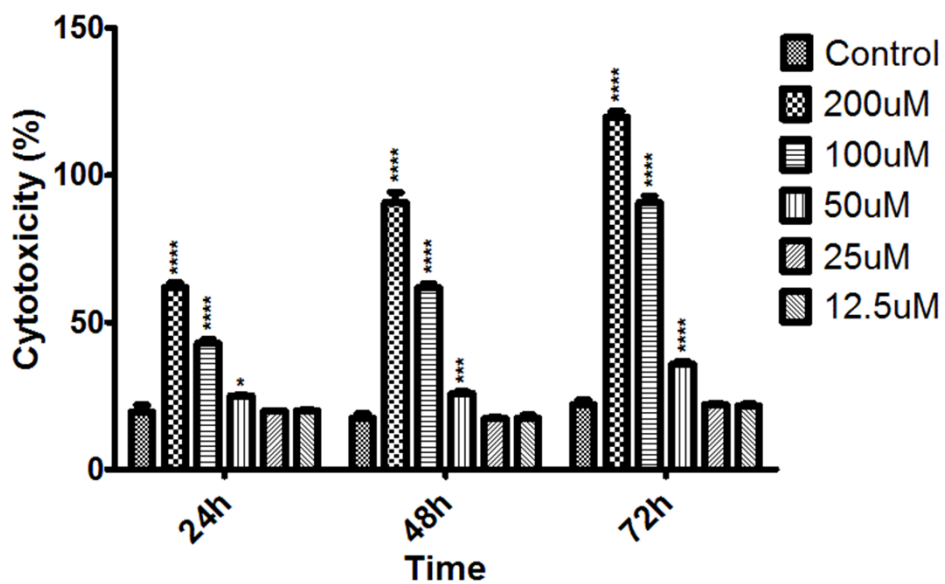

Fig. S7. % cytotoxicity of D-Met-LOB2 (8) and LOB2 (2) against the Sk-Br-3 cells.



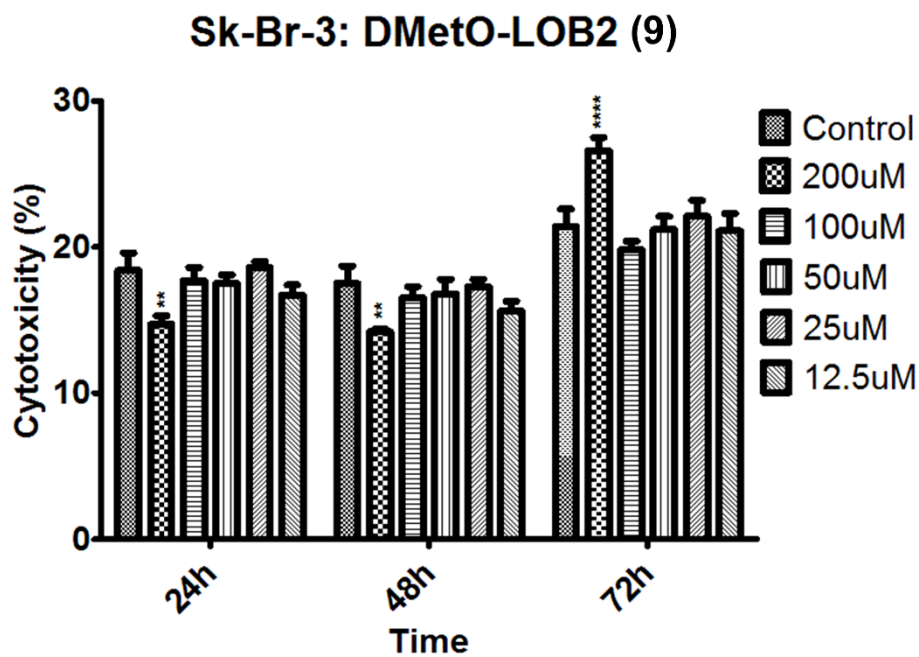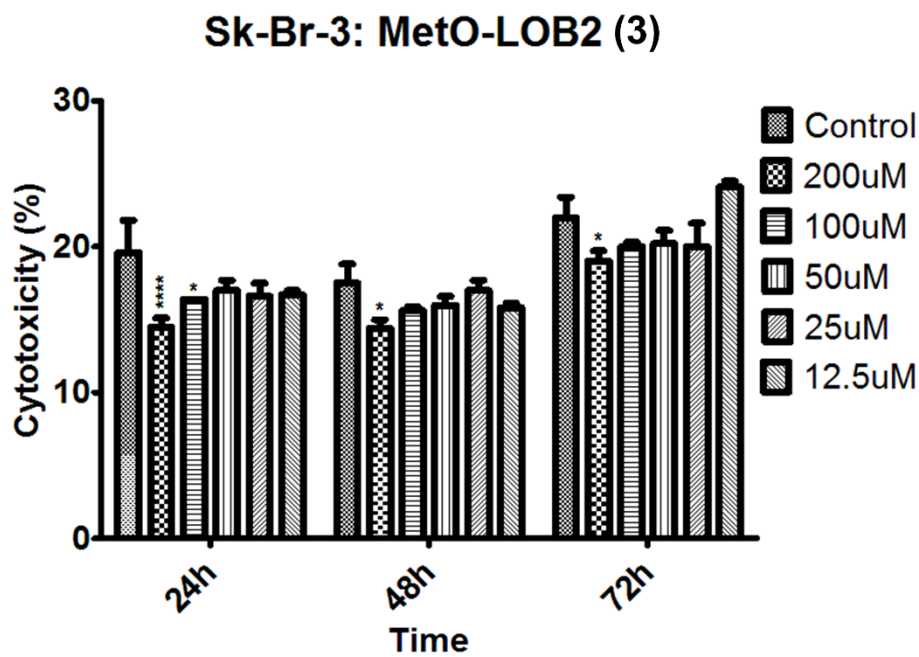

Fig. S8. % cytotoxicity of D-MetO-LOB2 (9) and L-MetO-LOB2 (3) against the Sk-Br-3 cells.

### Sk-Br-3: DMetO<sub>2</sub>-LOB2 (10)

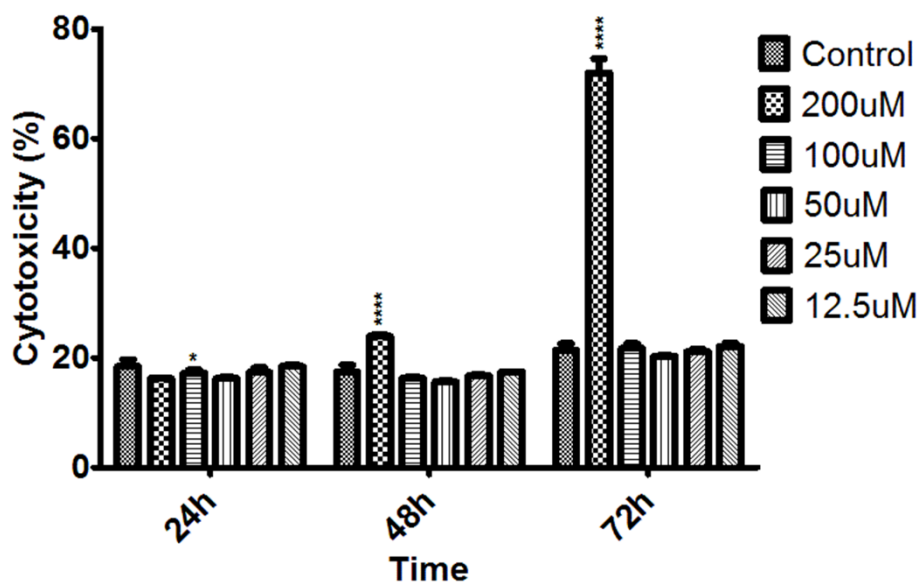

### Sk-Br-3: MetO<sub>2</sub>-LOB2 (4)

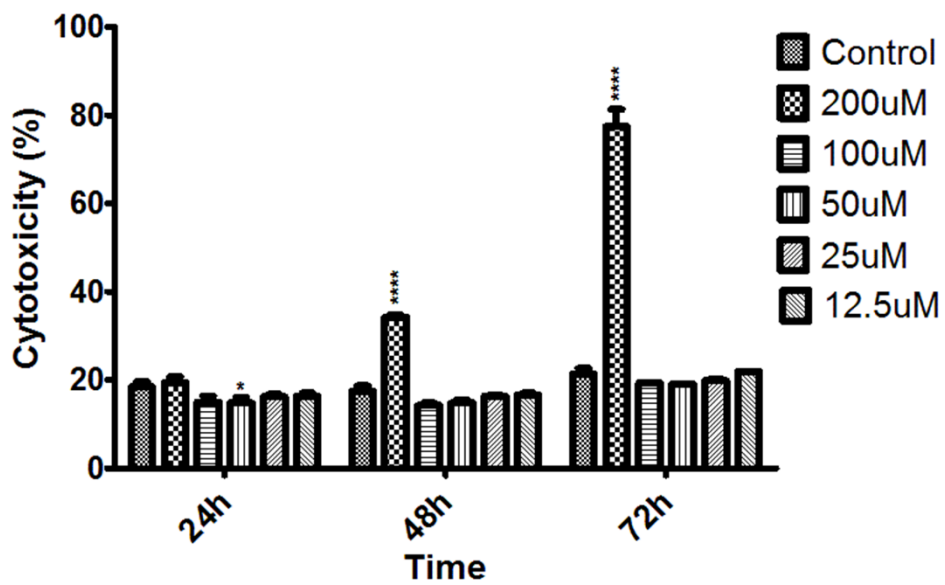

Fig. S9. % cytotoxicity of D-MetO<sub>2</sub>-LOB2 (10) and L-MetO<sub>2</sub>-LOB2 (4) against the Sk-Br-3 cells.

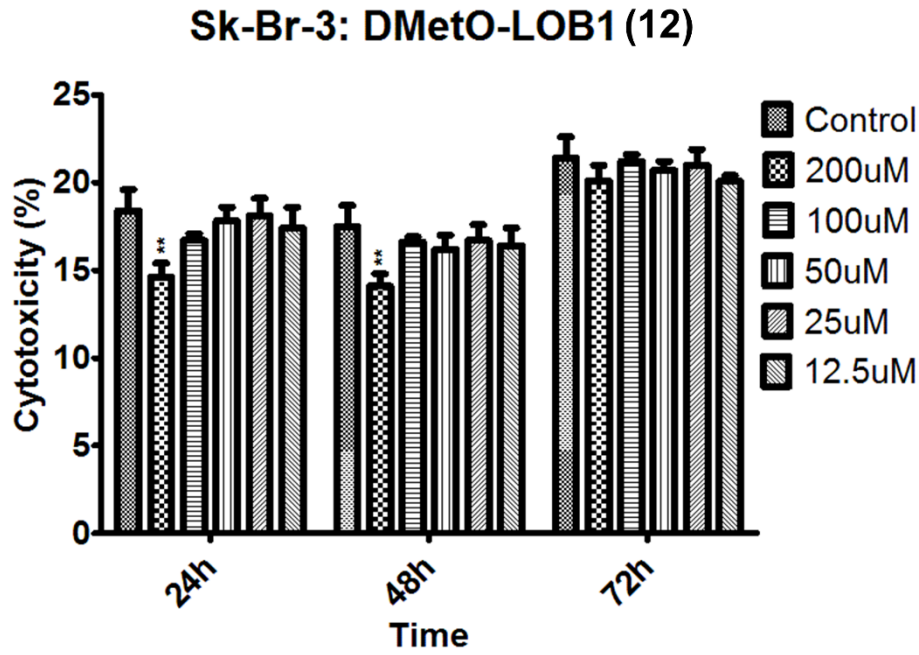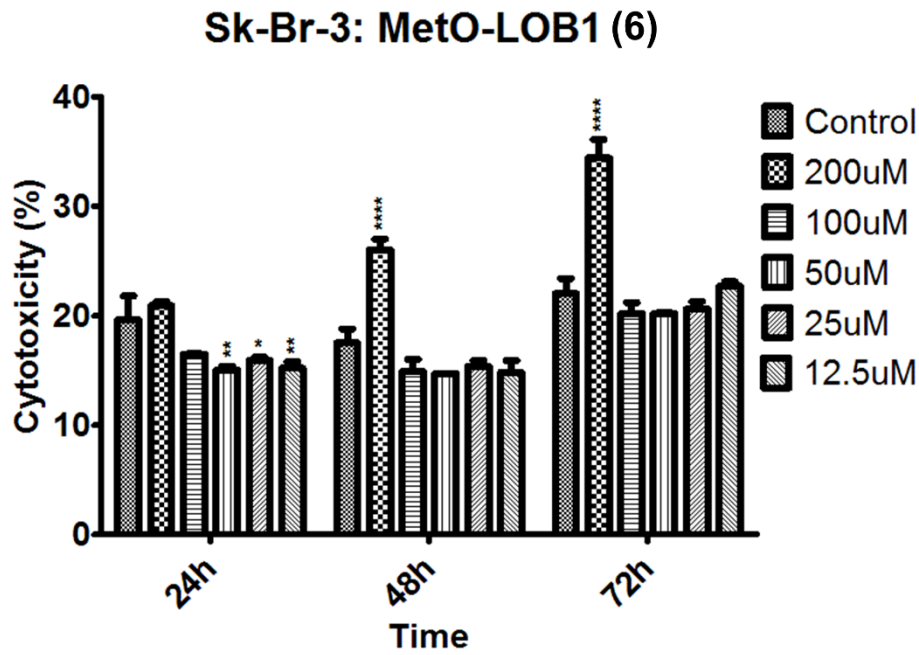

Fig. S10. % cytotoxicity of D-MetO-LOB1 (12) and L-MetO-LOB1 (6) against the Sk-Br-3 cells.

### Sk-Br-3: MetO2-LOB1 (7)

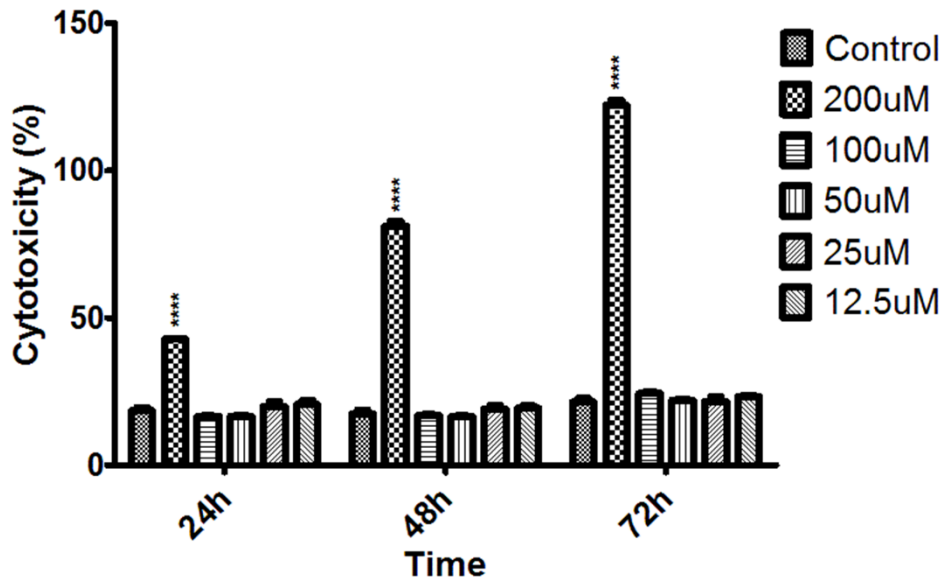

**Fig. S11.** % cytotoxicity of L-MetO<sub>2</sub>-LOB1 (7) against the Sk-Br-3 cells.

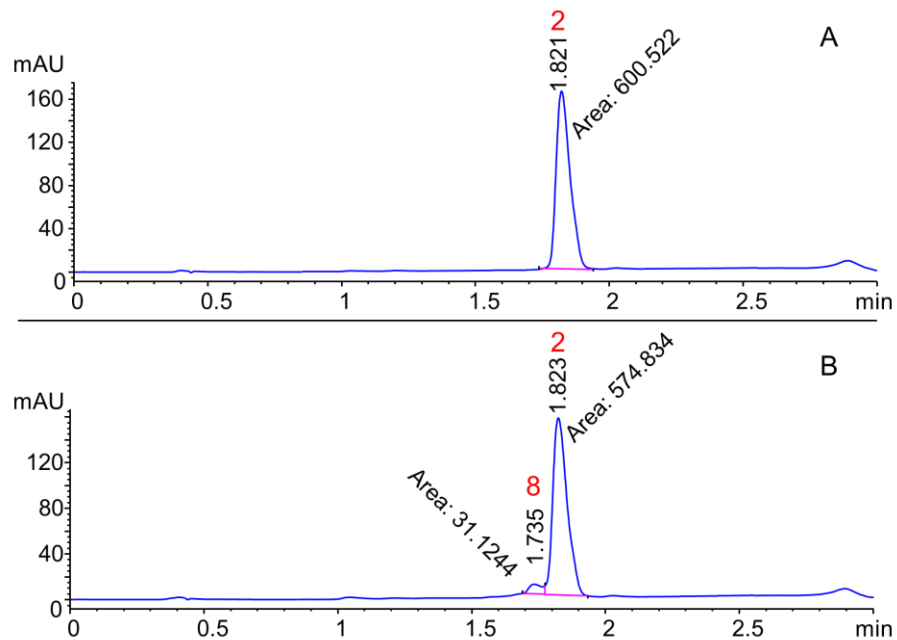

**Fig. S12.** HPLC chromatogram of (A) LO 2; (B) KOH treated LO 2.

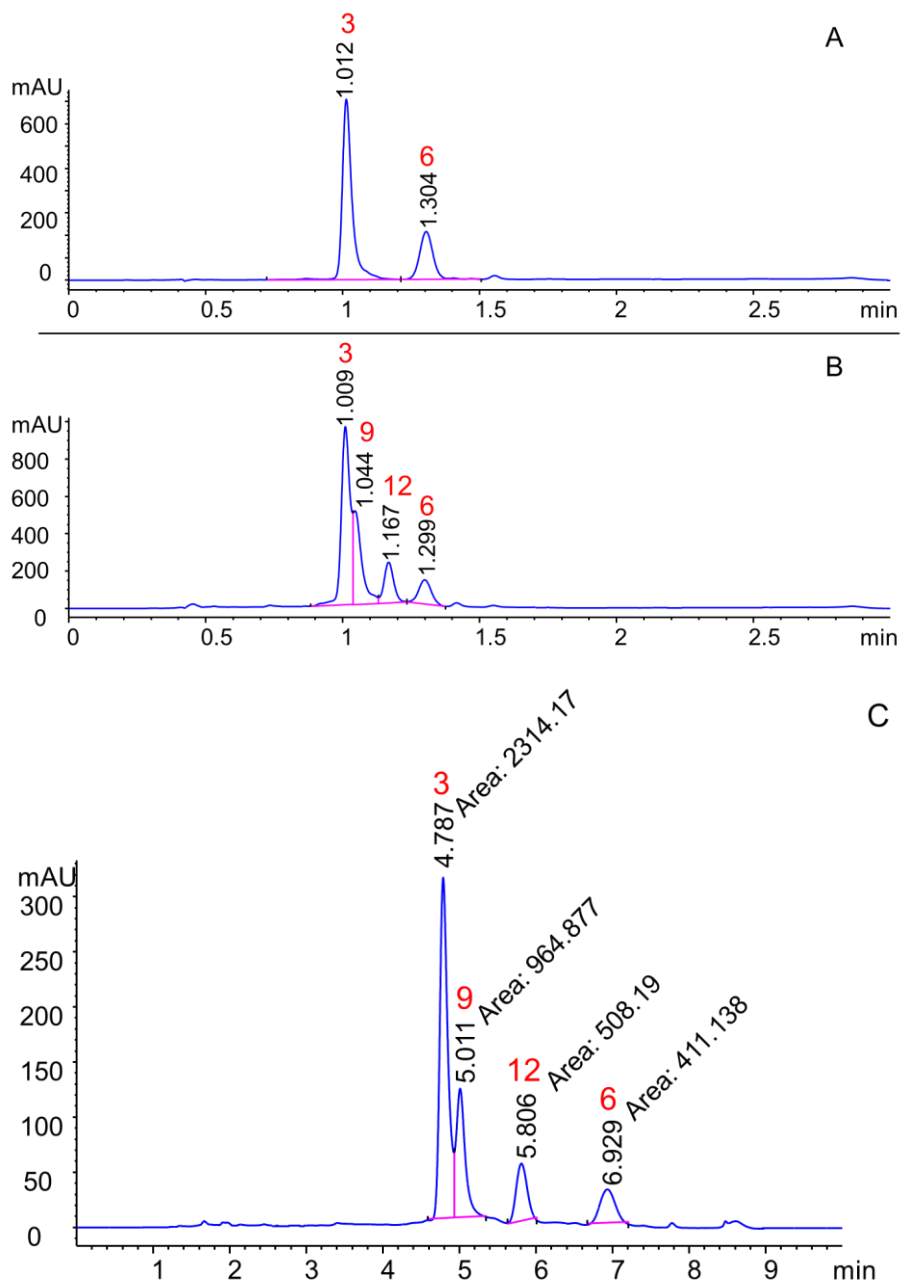

**Fig. S13.** HPLC chromatogram of (A) LOs **3** and **6**; (B) KOH treated LOs **3** and **6**; (C) KOH treated LOs **3** and **6** (preparative).

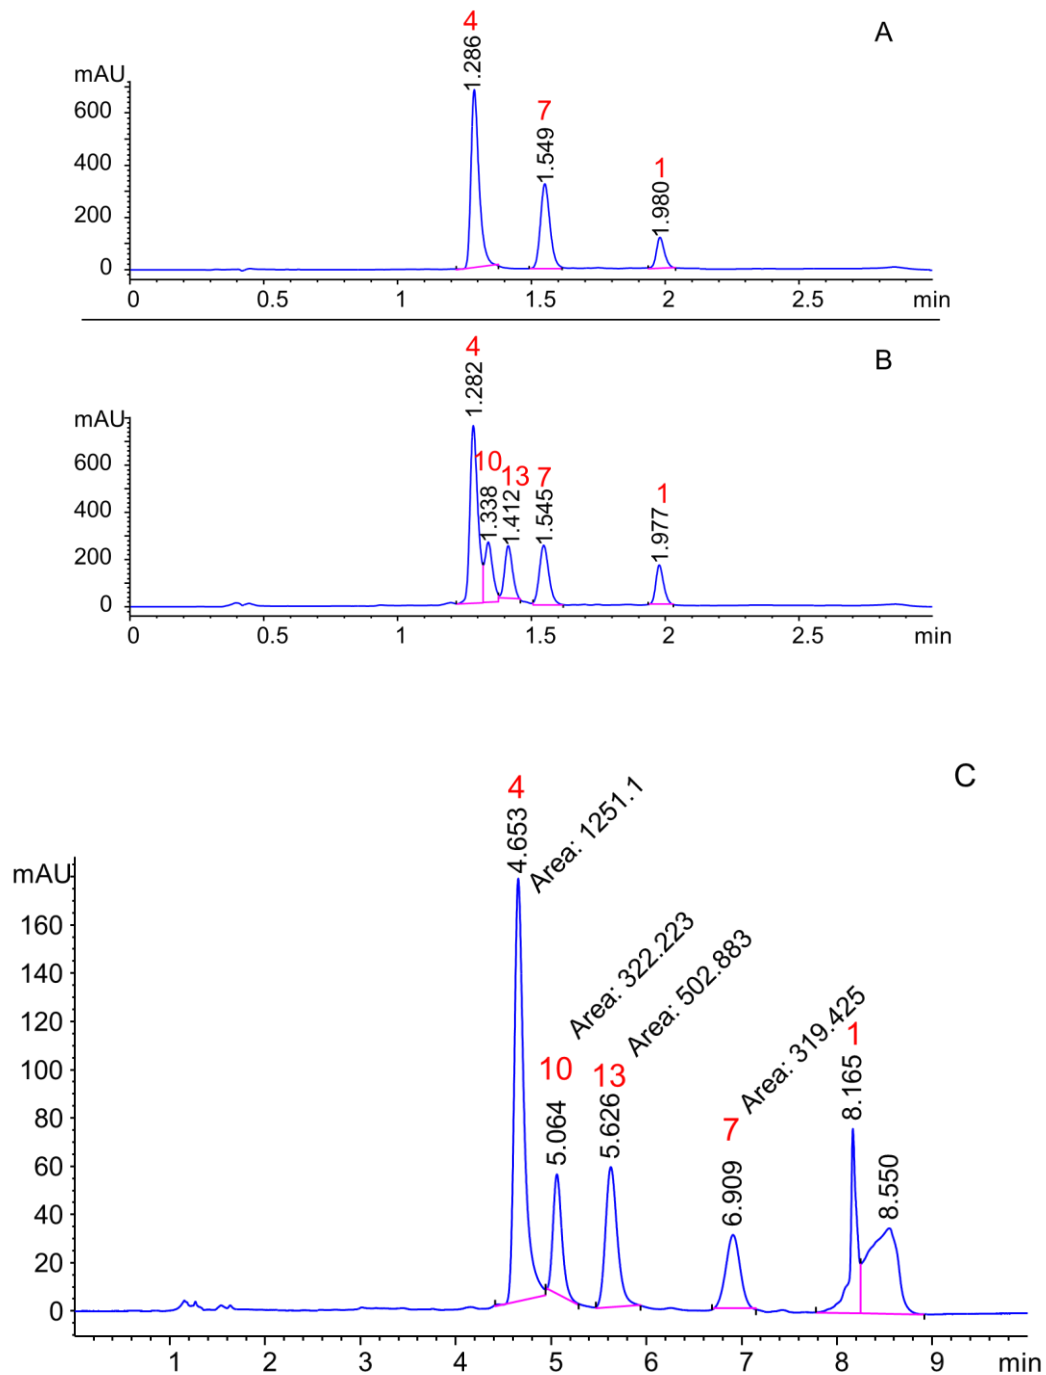

**Fig. S14.** HPLC chromatogram of (A) LOs **1**, **4** and **7**; (B) KOH treated LOs **1**, **4** and **7**; (C) KOH treated LOs **1**, **4** and **7** (preparative).

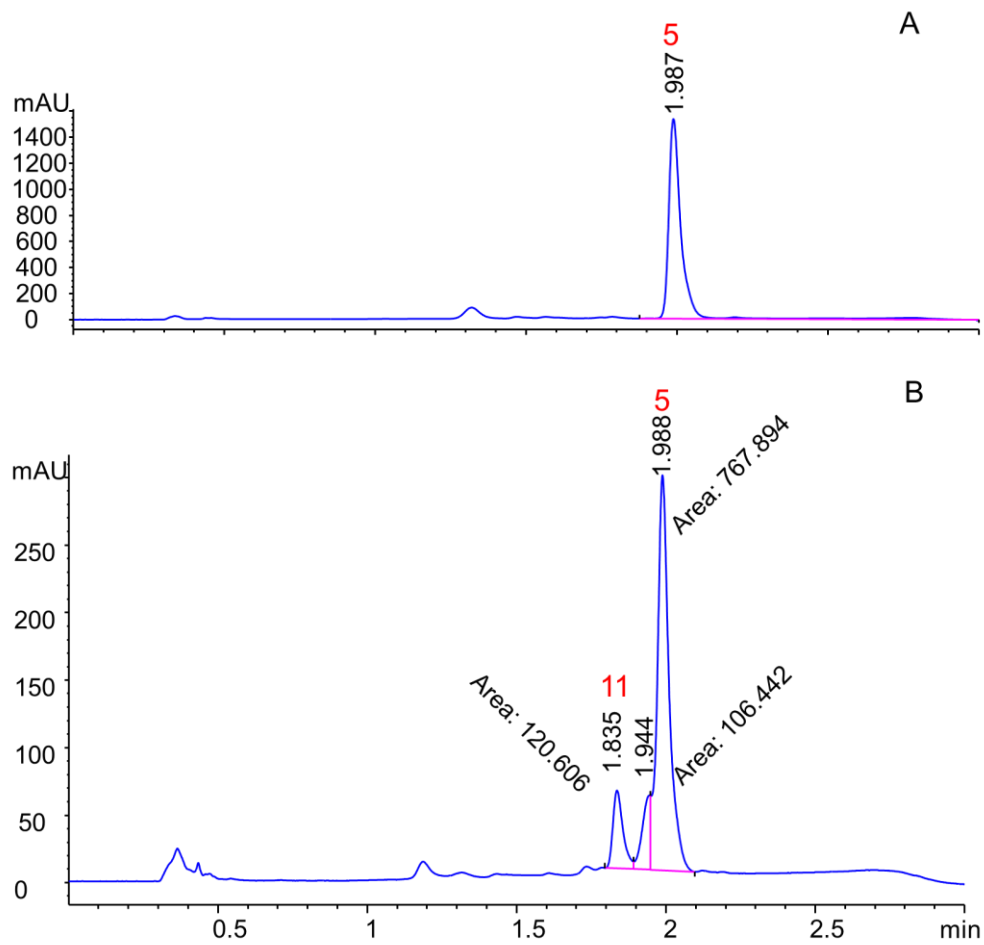

**Fig. S15.** HPLC chromatogram of (A) LO 5; (B) KOH treated LO 5.



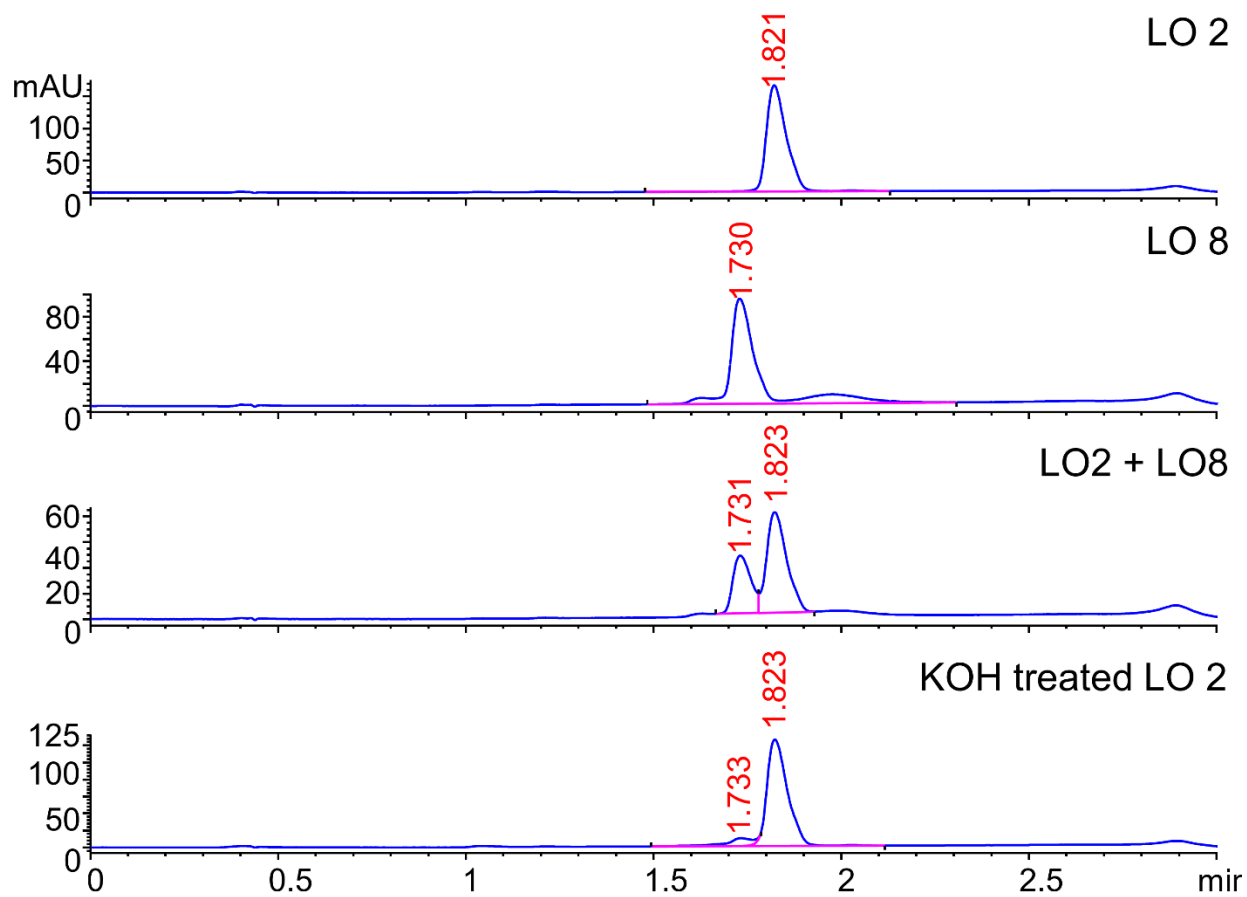

**Fig. S16.** HPLC chromatogram of LO 2, LO 8, LO 2 + LO 8 and KOH treated LO 2.

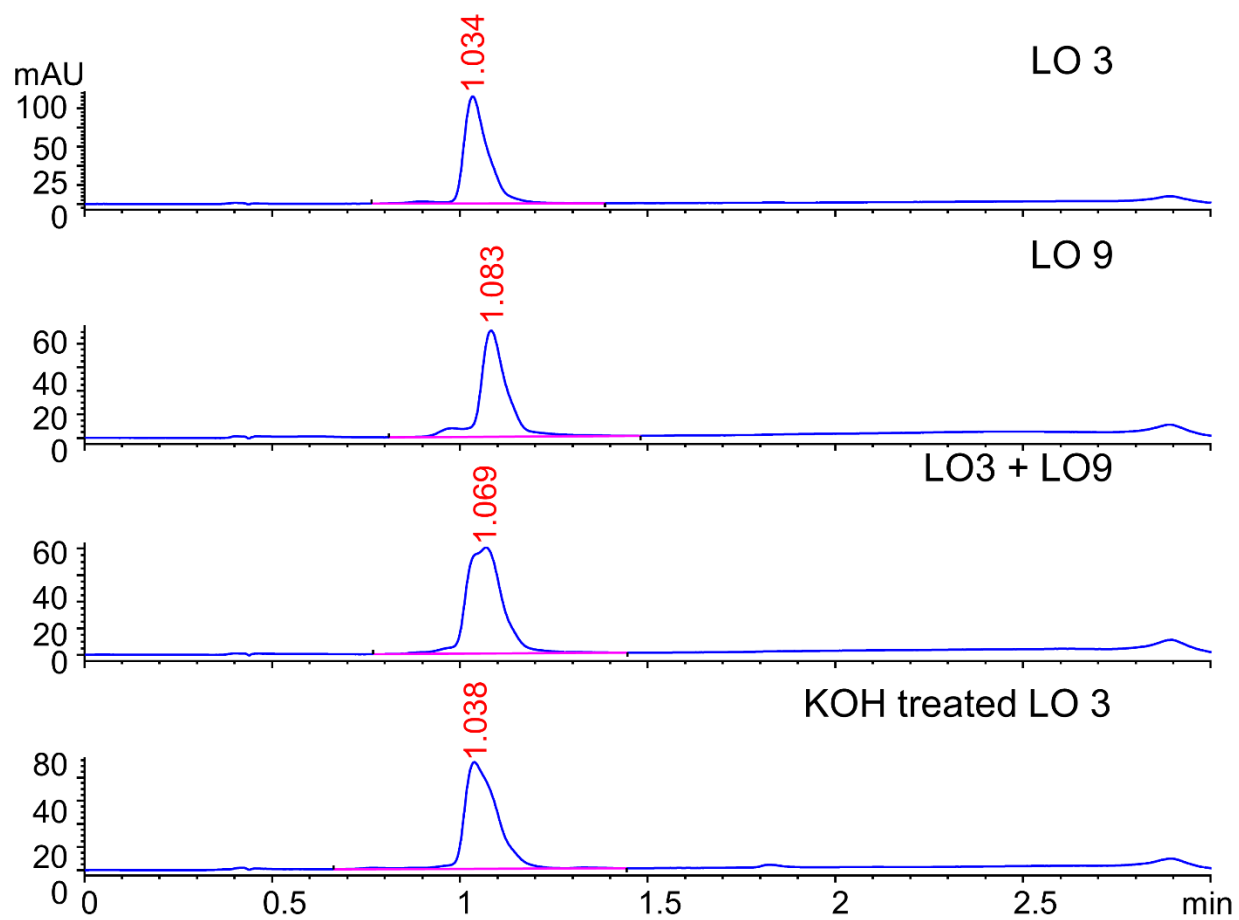

**Fig. S17.** HPLC chromatogram of LO 3, LO 9, LO 3 + LO 9 and KOH treated LO 3.

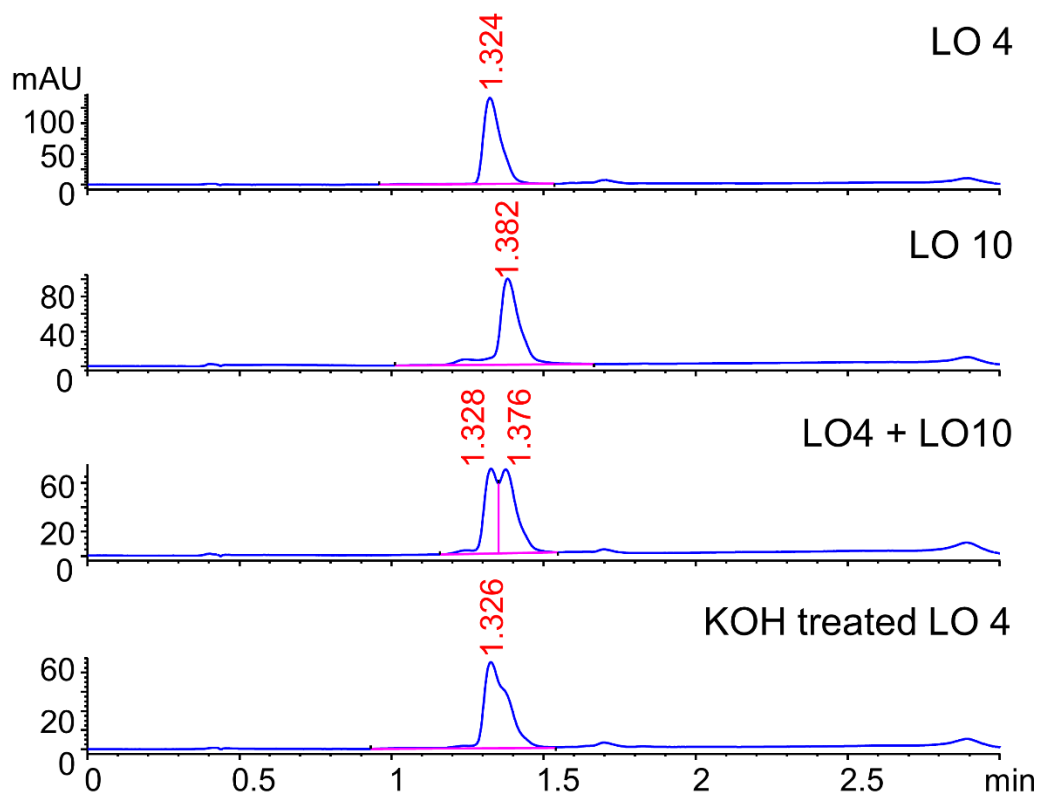

**Fig. S18.** HPLC chromatogram of LO 4, LO 10, LO 4 + LO 10 and KOH treated LO 4.

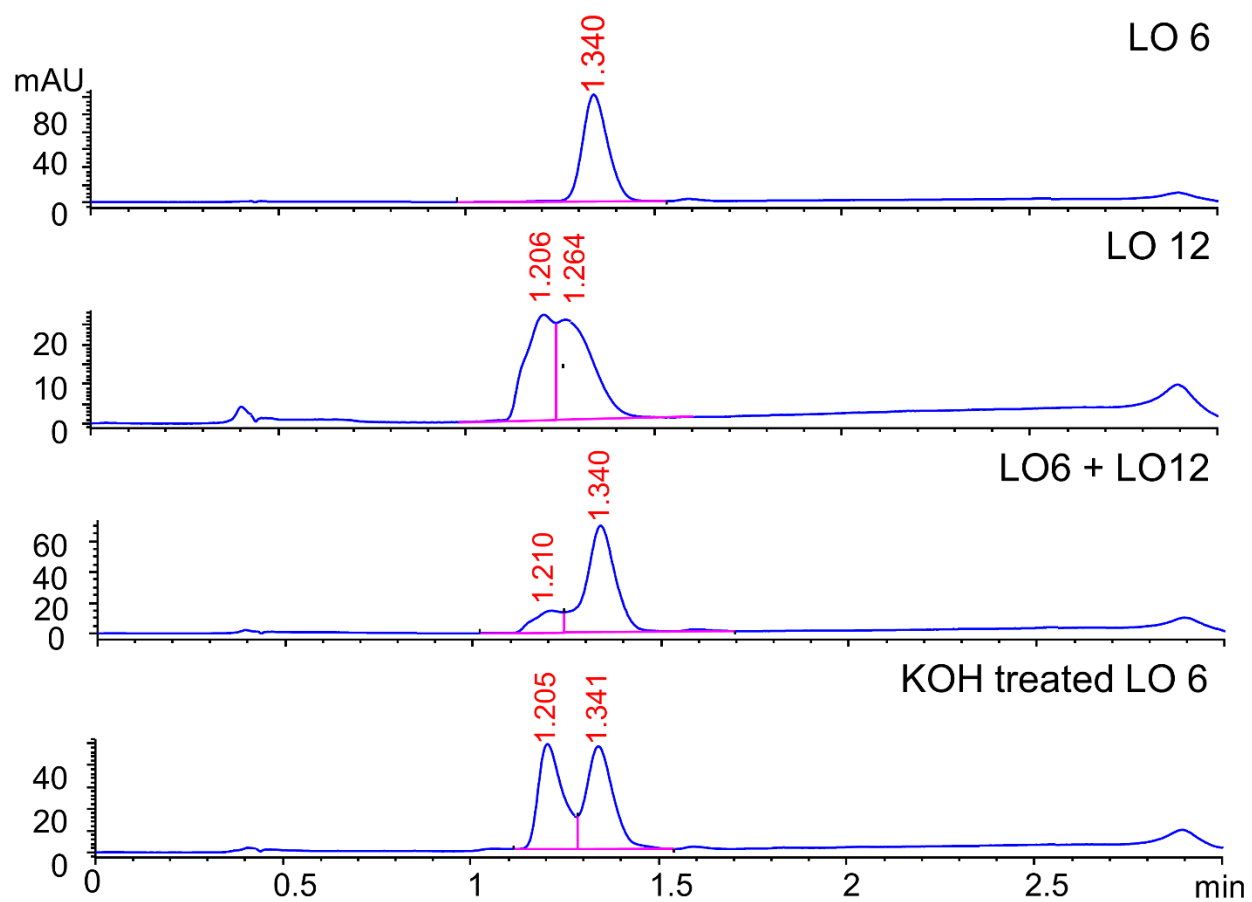

**Fig. S19.** HPLC chromatogram of LO 6, LO 12, LO 6 + LO 12 and KOH treated LO 6.

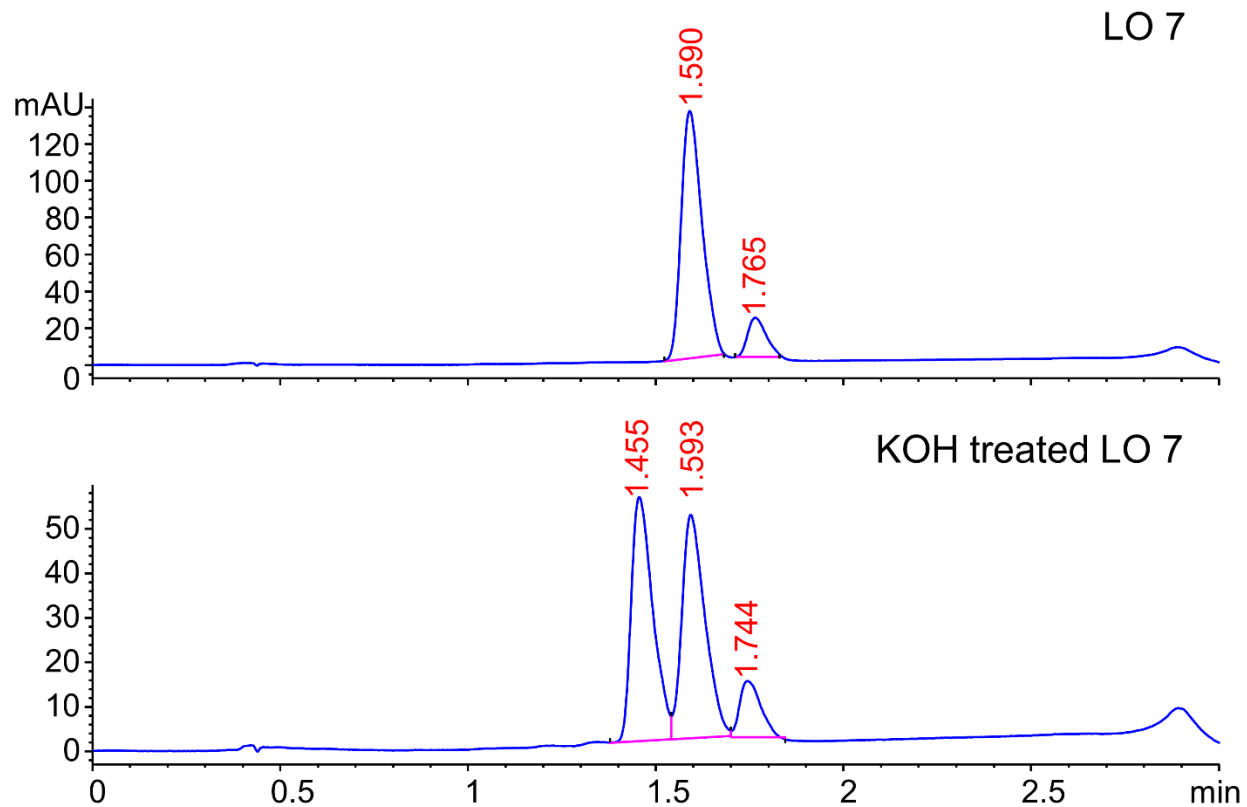

**Fig. S20.** HPLC chromatogram of LO 7 and KOH treated LO 7.

KOH treated LOs 3, 6

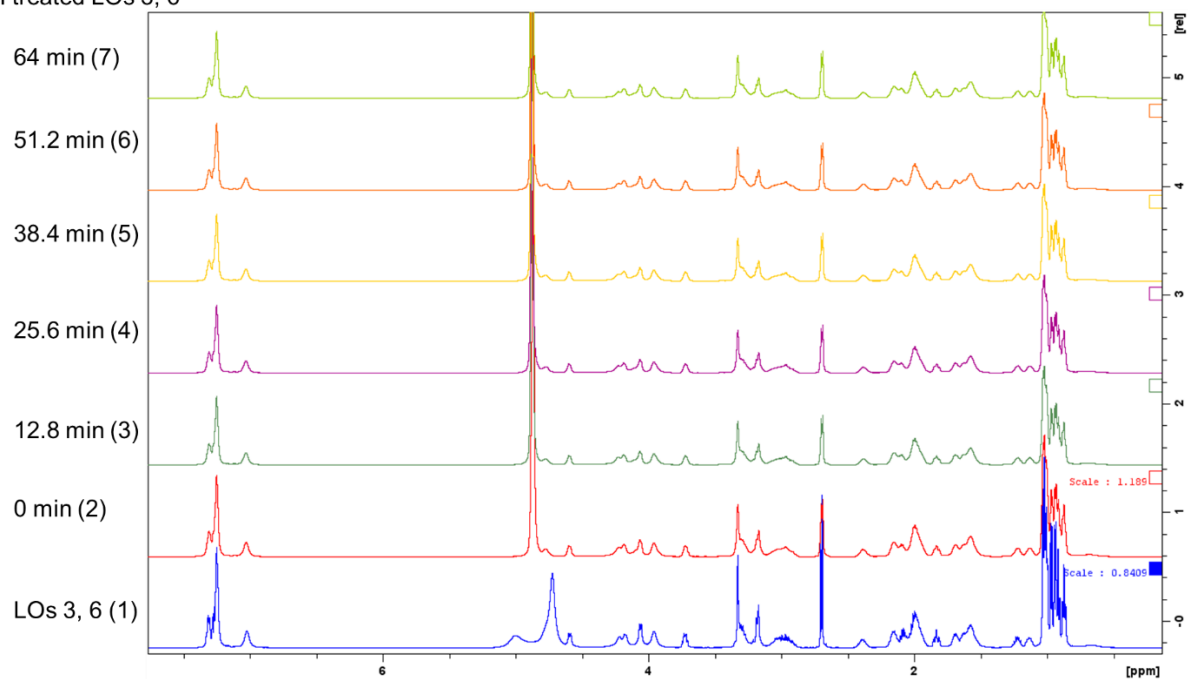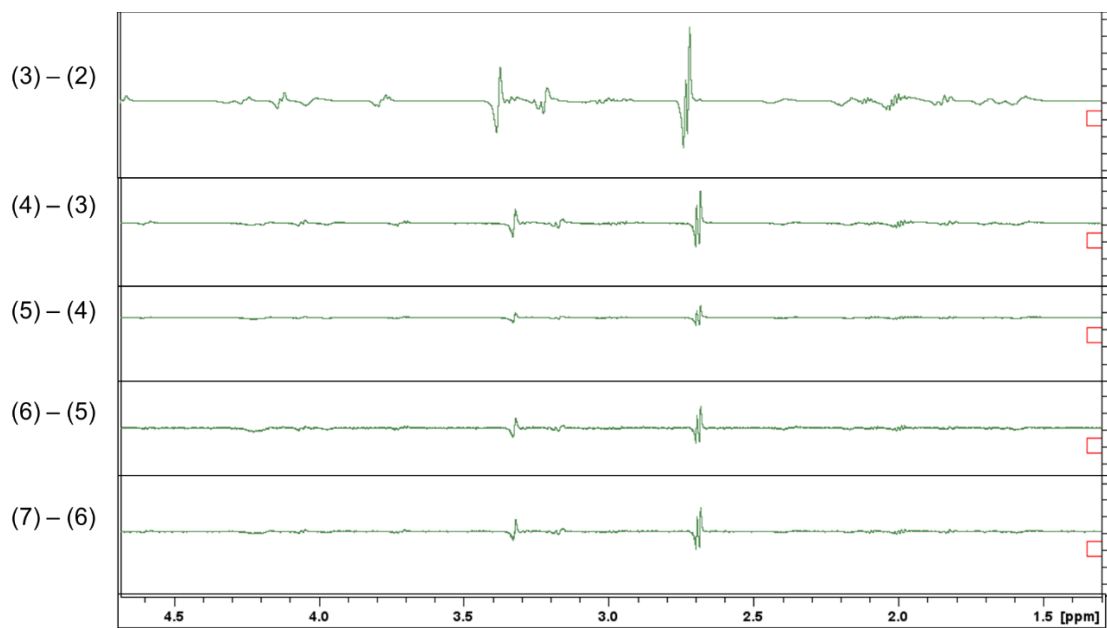

**Fig. S21.** (A) NMR spectra of LOs **3** and **6** mixture and KOH treated at different time intervals. (B) NMR difference spectra of KOH treated LOs **3** and **6**.

**Table S1** Amino acid sequences and masses of LOs **1-13**

| <b>LO<sup>a</sup></b><br><b>(code)</b>                                                                 | <b>amino acid sequence</b><br><b>(N<math>\alpha</math>C-)</b>                             | <b>chemical formula</b>                                          | <b>MW</b><br><b>(Da)</b> |
|--------------------------------------------------------------------------------------------------------|-------------------------------------------------------------------------------------------|------------------------------------------------------------------|--------------------------|
| [1-9-N $\alpha$ C]-linusorb B3 <b>(1)</b>                                                              | Ile-Leu-Val-Pro-Pro-Phe-Phe-Leu-Ile                                                       | C <sub>57</sub> H <sub>85</sub> N <sub>9</sub> O <sub>9</sub>    | 1040.34                  |
| [1-9-N $\alpha$ C]-linusorb B2 <b>(2)</b>                                                              | Met-Leu-Ile-Pro-Pro-Phe-Phe-Val-Ile                                                       | C <sub>56</sub> H <sub>83</sub> N <sub>9</sub> O <sub>9</sub> S  | 1058.38                  |
| [1-9-N $\alpha$ C],[1-( <i>R</i> <sub>s</sub> , <i>S</i> <sub>s</sub> )-MetO]-linusorb B2 <b>(3)</b>   | [( <i>R</i> <sub>s</sub> , <i>S</i> <sub>s</sub> )-MetO]-Leu-Ile-Pro-Pro-Phe-Phe-Val-Ile  | C <sub>56</sub> H <sub>83</sub> N <sub>9</sub> O <sub>10</sub> S | 1074.38                  |
| [1-9-N $\alpha$ C],[1-MetO <sub>2</sub> ]-linusorb B2 <b>(4)</b>                                       | MetO <sub>2</sub> -Leu-Ile-Pro-Pro-Phe-Phe-Val-Ile                                        | C <sub>56</sub> H <sub>83</sub> N <sub>9</sub> O <sub>11</sub> S | 1090.38                  |
| [1-8-N $\alpha$ C]-linusorb B1 <b>(5)</b>                                                              | Met-Leu-Val-Phe-Pro-Leu-Phe-Ile                                                           | C <sub>51</sub> H <sub>76</sub> N <sub>8</sub> O <sub>8</sub> S  | 961.26                   |
| [1-8-N $\alpha$ C],[1-( <i>R</i> <sub>s</sub> , <i>S</i> <sub>s</sub> )-MetO]-linusorb B1 <b>(6)</b>   | [( <i>R</i> <sub>s</sub> , <i>S</i> <sub>s</sub> )-MetO]-Leu-Val-Phe-Pro-Leu-Phe-Ile      | C <sub>51</sub> H <sub>76</sub> N <sub>8</sub> O <sub>9</sub> S  | 977.26                   |
| [1-8-N $\alpha$ C],[1-MetO <sub>2</sub> ]-linusorb B1 <b>(7)</b>                                       | MetO <sub>2</sub> -Leu-Val-Phe-Pro-Leu-Phe-Ile                                            | C <sub>51</sub> H <sub>76</sub> N <sub>8</sub> O <sub>10</sub> S | 993.26                   |
| [1-9-N $\alpha$ C], DMet-linusorb B2 <b>(8)</b>                                                        | DMet-Leu-Ile-Pro-Pro-Phe-Phe-Val-Ile                                                      | C <sub>56</sub> H <sub>83</sub> N <sub>9</sub> O <sub>9</sub> S  | 1058.38                  |
| [1-9-N $\alpha$ C],[1-( <i>R</i> <sub>s</sub> , <i>S</i> <sub>s</sub> )-DMetO]-linusorb B2 <b>(9)</b>  | [( <i>R</i> <sub>s</sub> , <i>S</i> <sub>s</sub> )-DMetO]-Leu-Ile-Pro-Pro-Phe-Phe-Val-Ile | C <sub>56</sub> H <sub>83</sub> N <sub>9</sub> O <sub>10</sub> S | 1074.38                  |
| [1-9-N $\alpha$ C],[1-DMetO <sub>2</sub> ]-linusorb B2 <b>(10)</b>                                     | DMetO <sub>2</sub> -Leu-Ile-Pro-Pro-Phe-Phe-Val-Ile                                       | C <sub>56</sub> H <sub>83</sub> N <sub>9</sub> O <sub>11</sub> S | 1090.38                  |
| [1-8-N $\alpha$ C], DMet-linusorb B1 <b>(11)</b>                                                       | DMet-Leu-Val-Phe-Pro-Leu-Phe-Ile                                                          | C <sub>51</sub> H <sub>76</sub> N <sub>8</sub> O <sub>8</sub> S  | 961.26                   |
| [1-8-N $\alpha$ C],[1-( <i>R</i> <sub>s</sub> , <i>S</i> <sub>s</sub> )-DMetO]-linusorb B1 <b>(12)</b> | [( <i>R</i> <sub>s</sub> , <i>S</i> <sub>s</sub> )-DMetO]-Leu-Val-Phe-Pro-Leu-Phe-Ile     | C <sub>51</sub> H <sub>76</sub> N <sub>8</sub> O <sub>9</sub> S  | 977.26                   |
| [1-8-N $\alpha$ C],[1-DMetO <sub>2</sub> ]-linusorb B1 <b>(13)</b>                                     | DMetO <sub>2</sub> -Leu-Val-Phe-Pro-Leu-Phe-Ile                                           | C <sub>51</sub> H <sub>76</sub> N <sub>8</sub> O <sub>10</sub> S | 993.26                   |
